# Supplementary material for: Continuous cycles of CO2 absorption and amine regeneration with aqueous alkanolamines: a comparison of the efficiency between pure and blended DEA, MDEA and AMP solutions by 13C NMR spectroscopy
Source: Royal Society of Chemistry journal article supplement (doi:10.1039/b924889g), 2010-01-01
Supplement: b924889g.pdf [file b924889g.pdf]

## Electronic Supplementary Information

### <sup>13</sup>C NMR spectroscopy

Normally, the integration of the <sup>13</sup>C NMR resonances does not allow for a reliable quantification of species having carbon atoms in different environments, due to the different spin-lattice T<sub>1</sub> relaxation time which has a marked dependence on the number of protons attached to the carbon.<sup>15</sup> In the species we are dealing with, *i.e.* DEA carbamate and the rapidly exchanging (free ammine)/(protonated amine), the <sup>13</sup>C atoms of the CH<sub>2</sub>-CH<sub>2</sub> backbone (DEA, MDEA) and of CH<sub>2</sub>OH (AMP) have the same number of hydrogen atoms directly attached and likewise exhibit similar T<sub>1</sub>, as shown by the similar integrals featuring each CH<sub>2</sub> resonance (less than 2% of error). On the other hand, the <sup>13</sup>C atoms of HCO<sub>3</sub><sup>-</sup>/CO<sub>3</sub><sup>2-</sup> pair and of CO<sub>2</sub><sup>-</sup> functionality of DEA carbamate have no attached hydrogen and exhibit much higher relaxation times than those of CH<sub>2</sub> groups, thus resulting in lower intensity resonances. For these reasons the relative amounts of carbamate, free amine and protonated amine have been determined by NMR integration of the corresponding signals of the CH<sub>2</sub> carbons whose chemical shifts are markedly dependent on the chemical environment. As a matter of fact, we have carried out several <sup>13</sup>C NMR spectra on standard solutions containing free DEA, fully protonated DEA, DEA carbamate and accurately weighted amounts of these species in different molar ratios and we have found a quantitative relationship (less than 3 % error) between the relative peak areas of CH<sub>2</sub> carbon atoms and the known concentrations of each species. The quantification method is therefore empirically quite reliable likely reflecting similarities of the relaxation rate for similar CH<sub>2</sub> carbons in both carbamate and the rapidly exchanging (free amine)/(protonated amine).

In order to measure the relative amounts of fast equilibrating free amine and protonated amine by NMR analysis we have carried out a quantitative <sup>13</sup>C NMR study on D<sub>2</sub>O standard solutions of neat amine, protonated amine and their 1:1 molar mixture. Plotting of the chemical shifts of the <sup>13</sup>C-resonance due to CH<sub>2</sub>OH group provides a straight line with limiting values assigned to free amine [δ(CH<sub>2</sub>OH): DEA, 60.86 ppm; MDEA, 59.19 ppm; AMP, 71.75 ppm] and to protonated amine [δ(CH<sub>2</sub>OH): DEAH<sup>+</sup>, 57.05 ppm; MDEAH<sup>+</sup>, 55.71 ppm, AMPH<sup>+</sup>, 66.40 ppm]. As already reported for the HCO<sub>3</sub><sup>-</sup>/CO<sub>3</sub><sup>2-</sup> system,<sup>12</sup> the straight line featuring these plots suggest that the frequency of the resonance assigned to the carbon atom of the CH<sub>2</sub>CH<sub>2</sub> unit is proportional to the relative concentration of the two species.

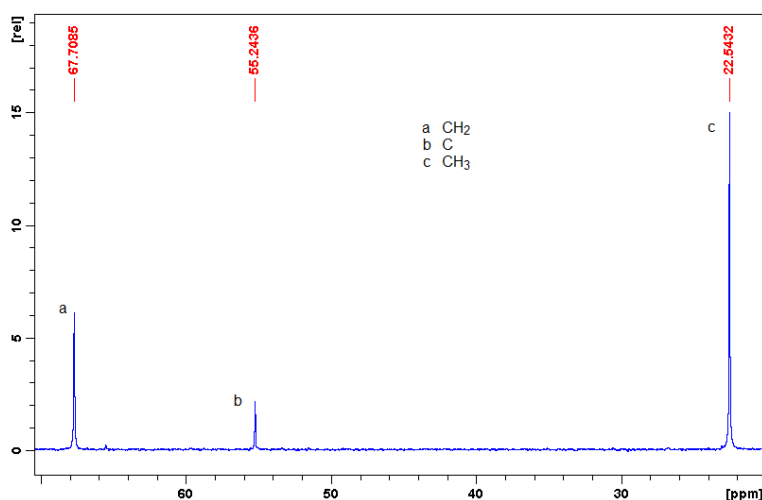

**Fig. 1.**  $^{13}\text{C}$  NMR spectrum of 2.00 M AMP at absorption equilibrium. The resonance of  $\text{HCO}_3^-/\text{CO}_3^{2-}$  is not reported.

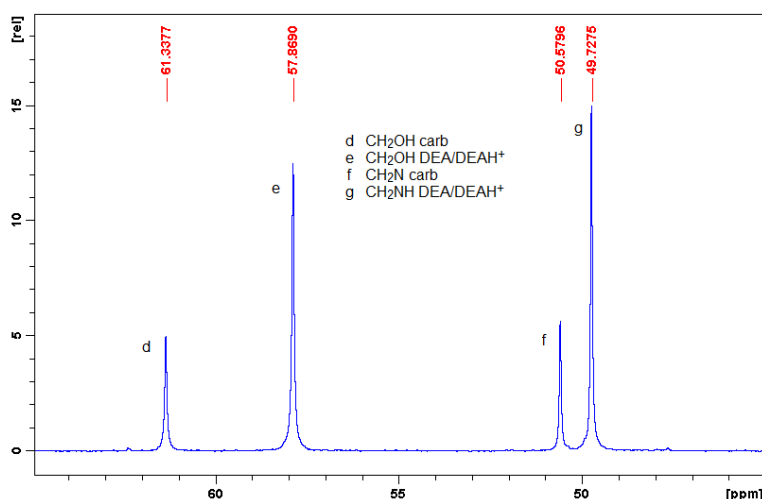

**Fig. 2.**  $^{13}\text{C}$  NMR spectrum of 2.00 M DEA at absorption equilibrium. The resonances of  $\text{HCO}_3^-/\text{CO}_3^{2-}$  and of  $-\text{CO}_2^-$  are not reported.

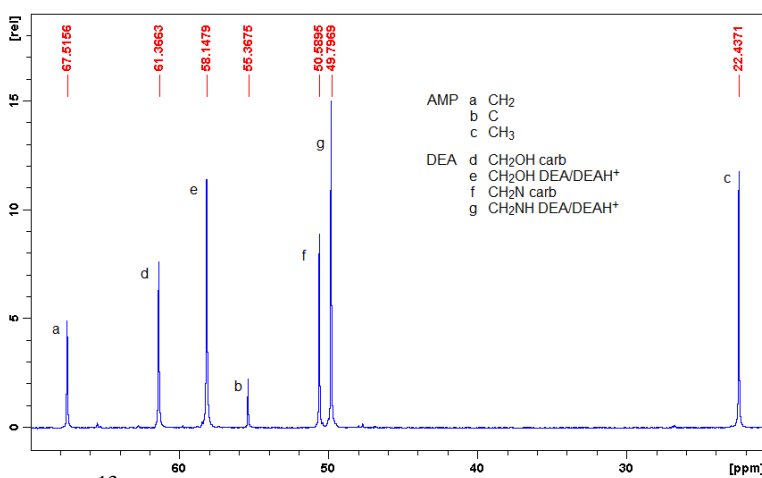

**Fig. 3.**  $^{13}\text{C}$  NMR spectrum of 2.00 M AMP/DEA blend (2/1 molar ratio) at absorption equilibrium. The resonances of  $\text{HCO}_3^-/\text{CO}_3^{2-}$  and of  $-\text{CO}_2^-$  of DEA carbamate are not reported.

### <sup>13</sup>C NMR analysis

As an example of the method used to compute the species in solution from <sup>13</sup>C NMR data, we report the computations related to the final absorption equilibrium of DEA solution 1.33 M.

On the basis of the CH<sub>2</sub>OH carbon resonance frequency<sup>8</sup> of DEAH<sup>+</sup>/DEA ( $\delta = 58.07$ ) and of carbon resonance<sup>12</sup> of HCO<sub>3</sub><sup>-</sup>/CO<sub>3</sub><sup>2-</sup> ( $\delta = 161.58$ ), we computed 0.367 DEA/DEAH<sup>+</sup> and 7.49 HCO<sub>3</sub><sup>-</sup>/CO<sub>3</sub><sup>2-</sup> molar ratios. Moreover, from the peak integration of the signals at 58.07 ppm and at 61.38 ppm [ $\delta(\text{CH}_2\text{OH})$  of DEACO<sub>2</sub><sup>-</sup>], 0.0884 mol of DEACO<sub>2</sub><sup>-</sup>, 0.228 mol of DEAH<sup>+</sup> and 0.0836 mol of residual free DEA have been computed.

The charge neutrality of the solution requires:

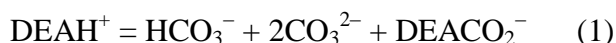

From equation (1) we obtain  $\text{DEAH}^+ - \text{DEACO}_2^- = \text{HCO}_3^- + 2\text{CO}_3^{2-} = 0.140$  mol.

Indicating as  $x$  the amount of HCO<sub>3</sub><sup>-</sup> and  $y$  that of CO<sub>3</sub><sup>2-</sup> we have the relations:

$$x + 2y = 0.140 \text{ mol and } x/y = 7.49 \quad (2)$$

Solving the system (2) we obtain HCO<sub>3</sub><sup>-</sup> = 0.110 mol and CO<sub>3</sub><sup>2-</sup> = 0.0147 mol. From these figures and from the amount of DEA carbamate, 0.0884 mol, we compute the relative distribution of CO<sub>2</sub> in solution as HCO<sub>3</sub><sup>-</sup> (51.6 %), CO<sub>3</sub><sup>2-</sup> (6.9 %) and DEACO<sub>2</sub><sup>-</sup> (41.5 %).

The method is simpler for MDEA and AMP solutions, due to the absence of the carbamate derivative.

The method to compute the average amine regeneration efficiency is based on the amounts of CO<sub>2</sub> measured during the absorption experiments and of the amounts of protonated amine, bicarbonate and carbonate as inferred from <sup>13</sup>C NMR spectral analysis. As an example, the regeneration efficiency of the AMP solution 1.33 M is computed as follows. The amount of absorbed CO<sub>2</sub> (0.787 mol) in the entire experiment is computed from the average absorption efficiency (91.0%) and the overall amount of CO<sub>2</sub> flowed through the absorbent (12 h; 0.827 mol), summed to the amount of CO<sub>2</sub> flowed in the starting desorber solution (0.0344 mol). The reaction of 0.787 mol of CO<sub>2</sub> with AMP produces protonated amine and HCO<sub>3</sub><sup>-</sup> [reaction (3); CO<sub>2(</sub>abs)/AMPH<sup>+</sup> = 1/1] and CO<sub>3</sub><sup>2-</sup> [reaction (4); CO<sub>2(</sub>abs)/AMPH<sup>+</sup> = 1/2]

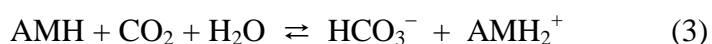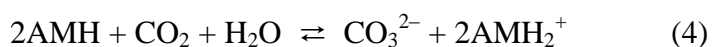

From the <sup>13</sup>C NMR analysis we derive the average values of 0.117 mol of HCO<sub>3</sub><sup>-</sup> (69.6%) and of 0.0511 mol of CO<sub>3</sub><sup>2-</sup> (30.4%): from these percentages we compute the overall amount of protonated

AMP (1.026 mol). At the end of the experiment the overall amount of protonated AMP contained in both the absorber and the desorber solution is 0.587 mol (from  $^{13}\text{C}$  NMR analysis). The difference  $1.026 \text{ mol} - 0.587 \text{ mol} = 0.439 \text{ mol}$  represents the amount of protonated amine that has regenerated free amine according to the reactions (5) and (6).

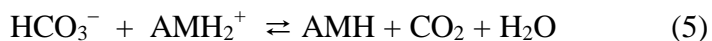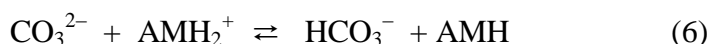

From the 0.439/1.026 ratio we compute 42.8% of regenerated amine during the entire experiment: we have defined this value the amine regeneration efficiency. Obviously, at the end of any experiment when the equilibrium has been reached, the regeneration efficiency of all the amine is 100%.

For DEA solutions, the percentage of carbamate has been also considered to evaluate the overall amount of protonated DEA.

The loading capacity of the single amines has been computed as the molar ratio between the overall amount of absorbed  $\text{CO}_2$  at the end of each experiment and the summed amounts of the starting and regenerated amine. In the above example of AMP 1.33 M combined with 373 K of desorber temperature, we have computed 0.439 mol of regenerated amine and 0.787 mol of absorbed  $\text{CO}_2$ . The overall amount of starting amine in both absorber and desorber is 0.800 mol. The ratio  $0.787(\text{mol})/1.239(\text{mol}) = 0.635$  is the computed loading capacity.

We cannot compute the regeneration efficiency and loading capacity of blended amines as  $^{13}\text{C}$  NMR analysis give us the overall amount of  $\text{HCO}_3^-$  and  $\text{CO}_3^{2-}$  produced by the reaction of the two amines.
